# Supplementary material for: Use of Dexmedetomidine and Opioids in Hospitalized Preterm Infants
Source: PubMed Central journal article supplement (PMC10625033; doi:10.1001/jamanetworkopen.2023.41033), 2023-11-03
Supplement: jamanetwopen-e2341033-s001.pdf [file jamanetwopen-e2341033-s001.pdf]

## Supplementary Online Content

Curtis S, Kilpatrick R, Billimoria ZC, et al. Use of dexmedetomidine and opioids in hospitalized preterm infants. *JAMA Netw Open*. 2023;6(11):e2341033.  
doi:10.1001/jamanetworkopen.2023.41033

### **eFigure.** Flowchart

This supplementary material has been provided by the authors to give readers additional information about their work.

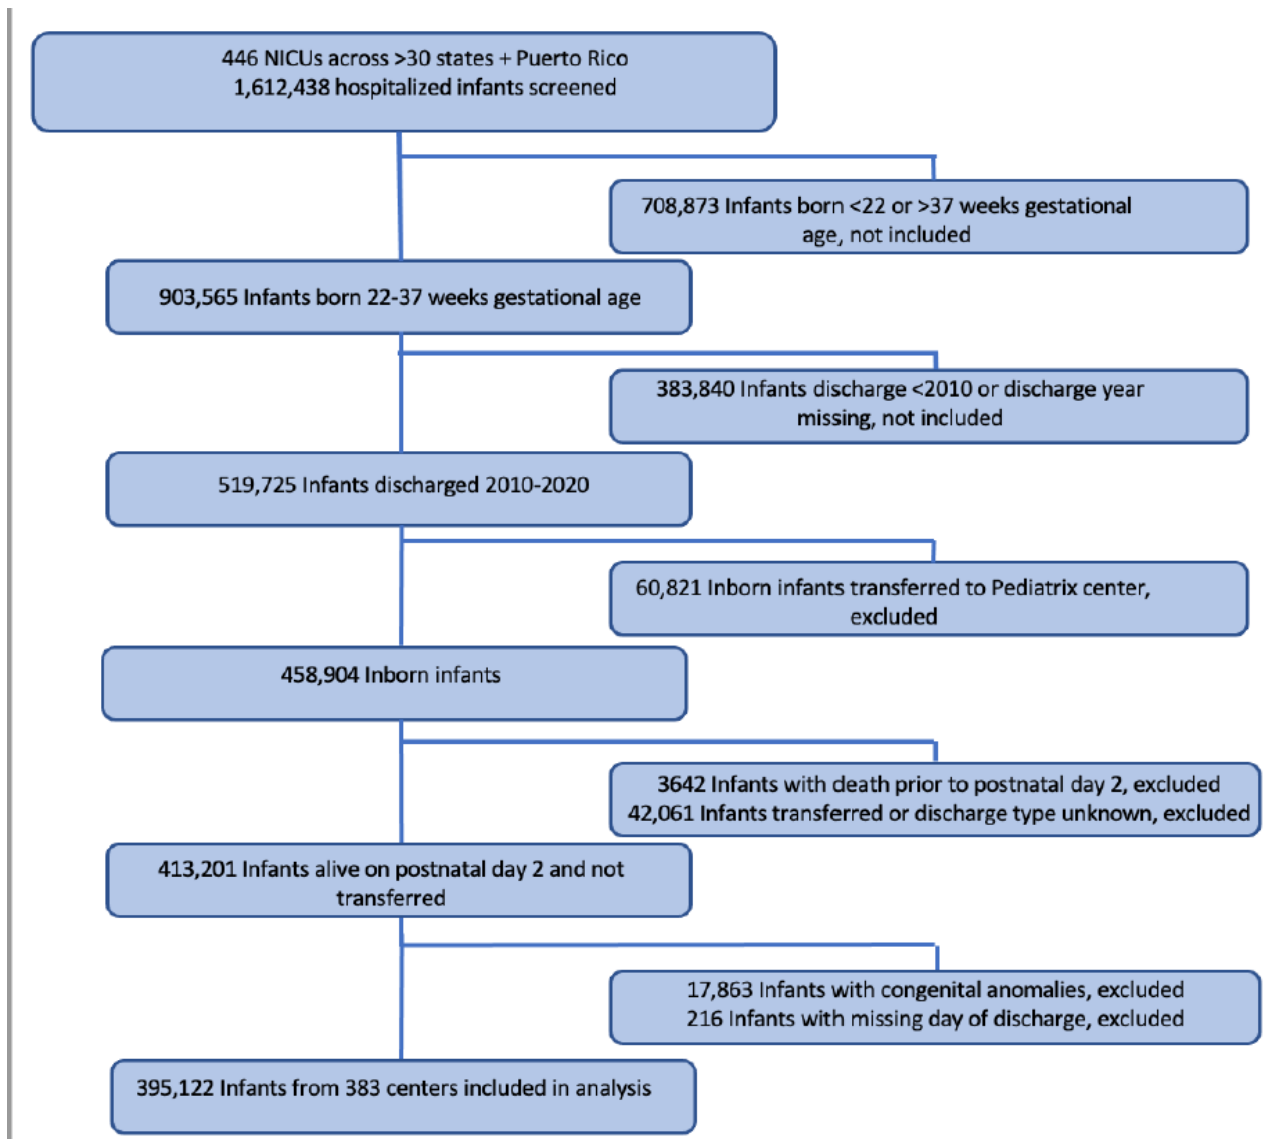

eFigure. Flowchart
