# Supplementary material for: Use of Dexmedetomidine and Opioids in Hospitalized Preterm Infants
Source: PubMed Central journal article supplement (PMC10625033; doi:10.1001/jamanetworkopen.2023.41033), 2023-11-03
Supplement: jamanetwopen-e2341033-s002.pdf [file jamanetwopen-e2341033-s002.pdf]

## Data Sharing Statement

Curtis. Use of Dexmedetomidine and Opioids in Hospitalized Preterm Infants. *JAMA Netw Open*. Published November 03, 2023. doi:10.1001/jamanetworkopen.2023.41033

### Data

**Data available:** No

### Additional Information

**Explanation for why data not available:** The datasets generated during and/or analyzed during the current study are available from the corresponding author on reasonable request
